# Supplementary material for: A benzofuran-β-alaninamide based “turn-on” fluorescent chemosensor for selective recognition of Fe3+ ions
Source: Royal Society of Chemistry journal article supplement (doi:10.1039/c9nj02655j), 2019-01-01
Supplement: c9nj02655j1.pdf [file c9nj02655j1.pdf]

## Benzofuran- $\beta$ -alaninamide based “turn-on” fluorescent chemosensor for selective recognition of $\text{Fe}^{3+}$ ions

P. Madhu<sup>a,b,\*</sup>, P. Sivakumar<sup>c</sup> and Rajendran Sribalan<sup>d</sup>

<sup>a</sup>Research and Development Centre, Bharathiar University, Coimbatore-641 046, Tamil Nadu, India

<sup>b</sup>Department of Chemistry, Thiruvalluvar Government Arts College, Rasipuram-637 401, Tamil Nadu, India

<sup>c</sup>Department of Chemistry, Arignar Anna Government Arts College, Namakkal-637 002, Tamil Nadu, India

<sup>d</sup>Biochemie Innovations Lab, Tindivanam-604 001, Tamil Nadu, India

\*Corresponding Author E-mail: [madhup.chem@gmail.com](mailto:madhup.chem@gmail.com)

Tel: +91 9944502310

### Supplementary Information

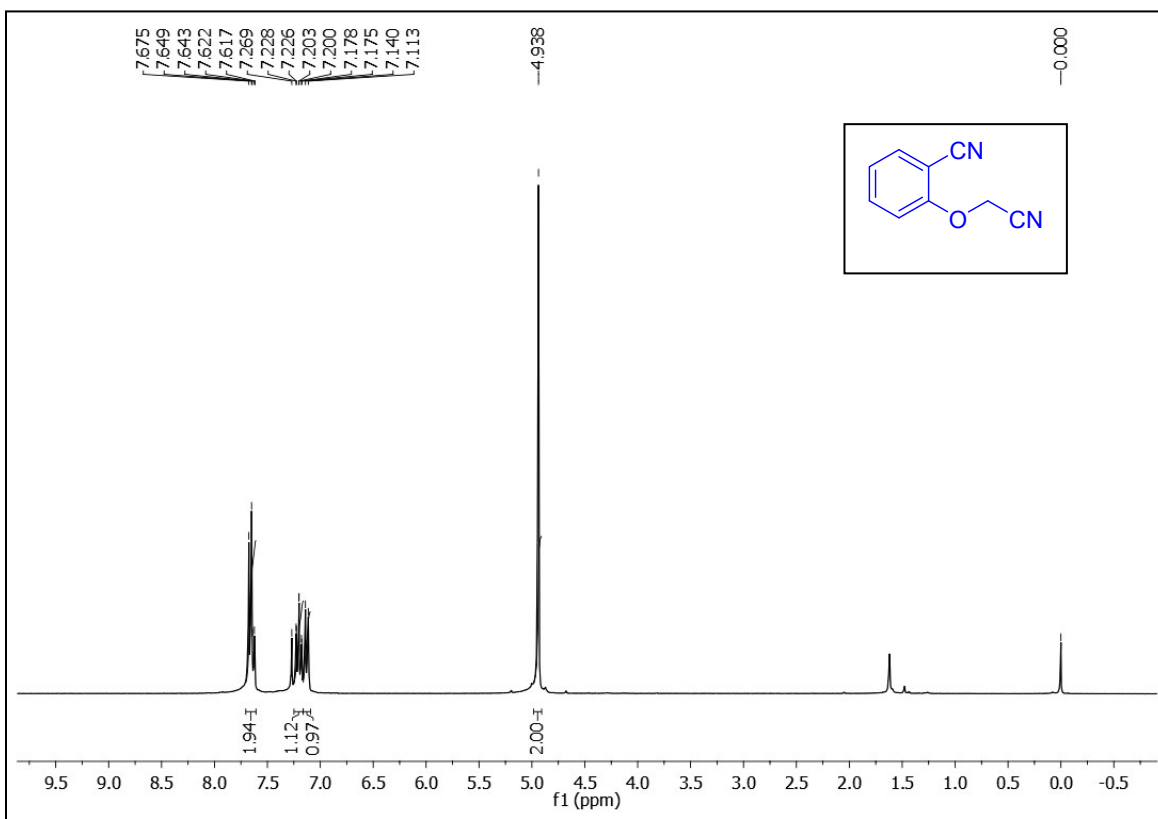

Fig. S1 <sup>1</sup>H NMR ( $\text{CDCl}_3$ , 300MHz) of compound 2

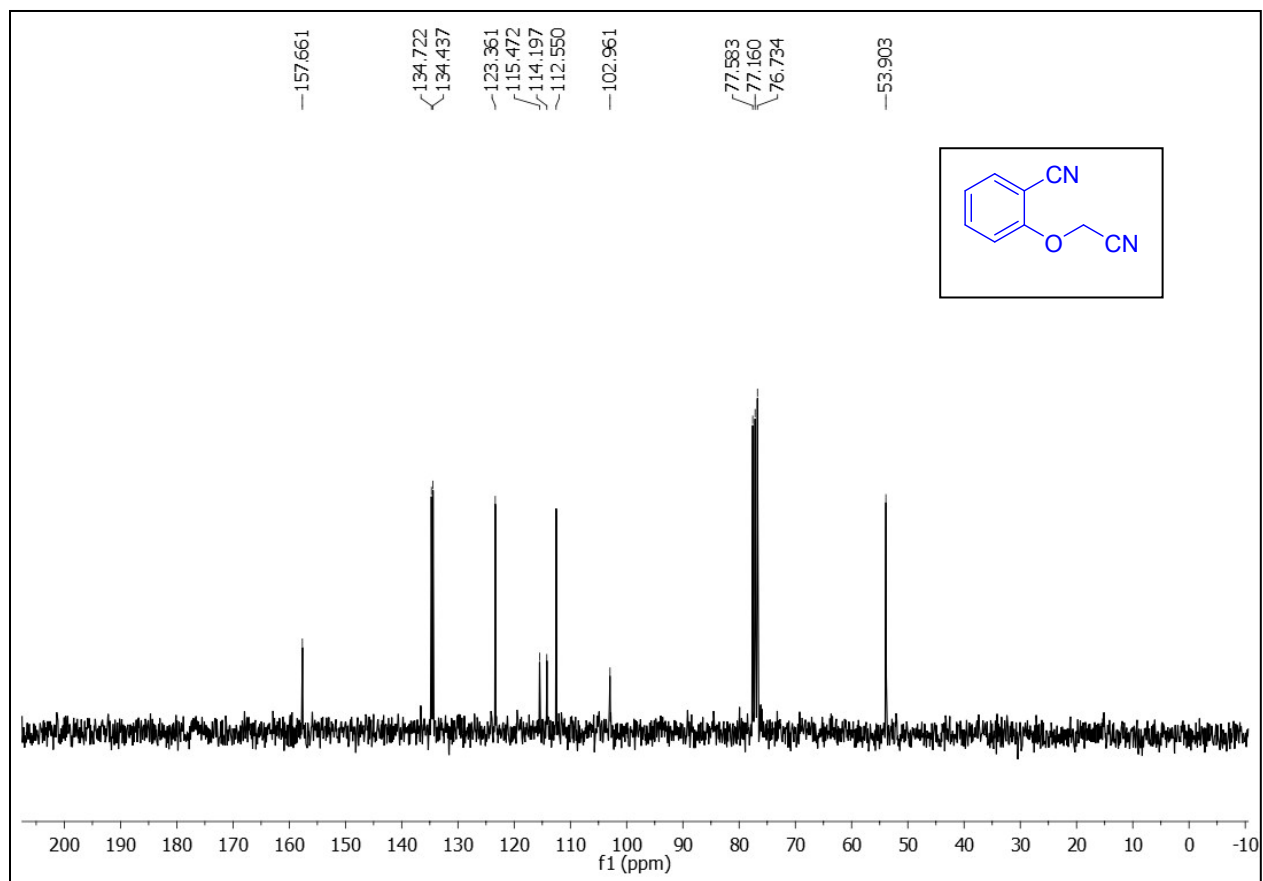

**Fig. S2**  $^{13}\text{C}$  NMR (CDCl<sub>3</sub>, 75MHz) spectrum of 2

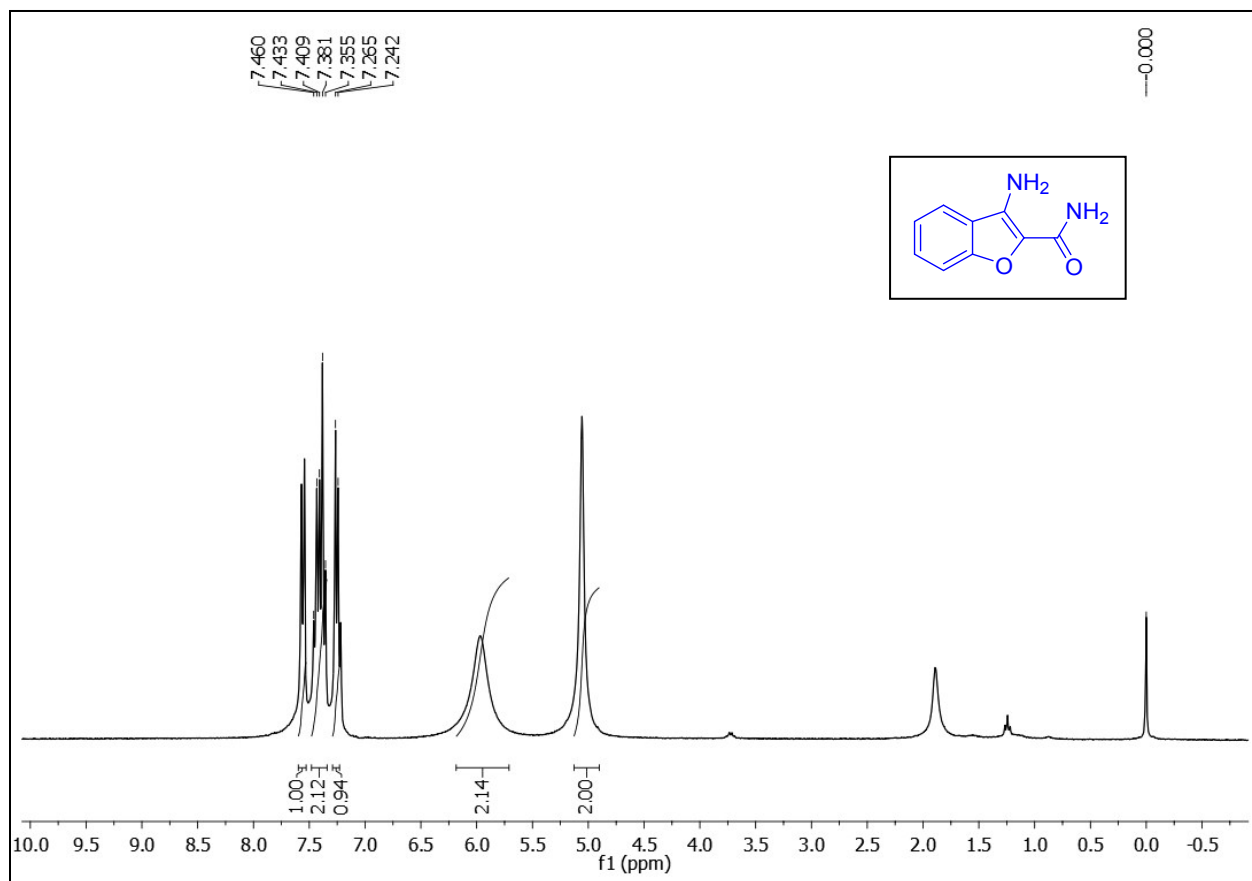

**Fig. S3**  $^1\text{H}$  NMR ( $\text{CDCl}_3$ , 300MHz) of compound 3

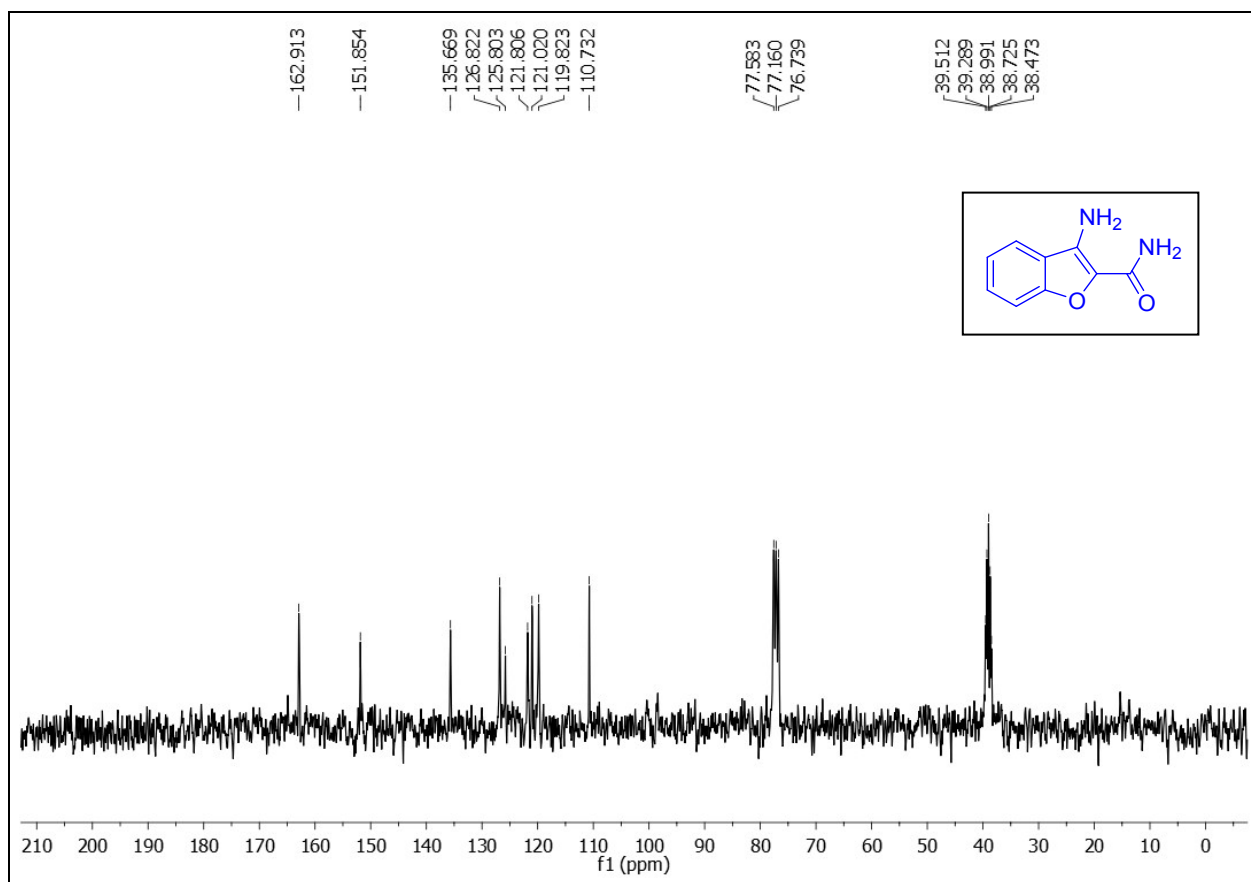

**Fig. S4**  $^{13}\text{C}$  NMR ( $\text{CDCl}_3+\text{DMSO-D}_6$ , 75MHz) spectrum of 3

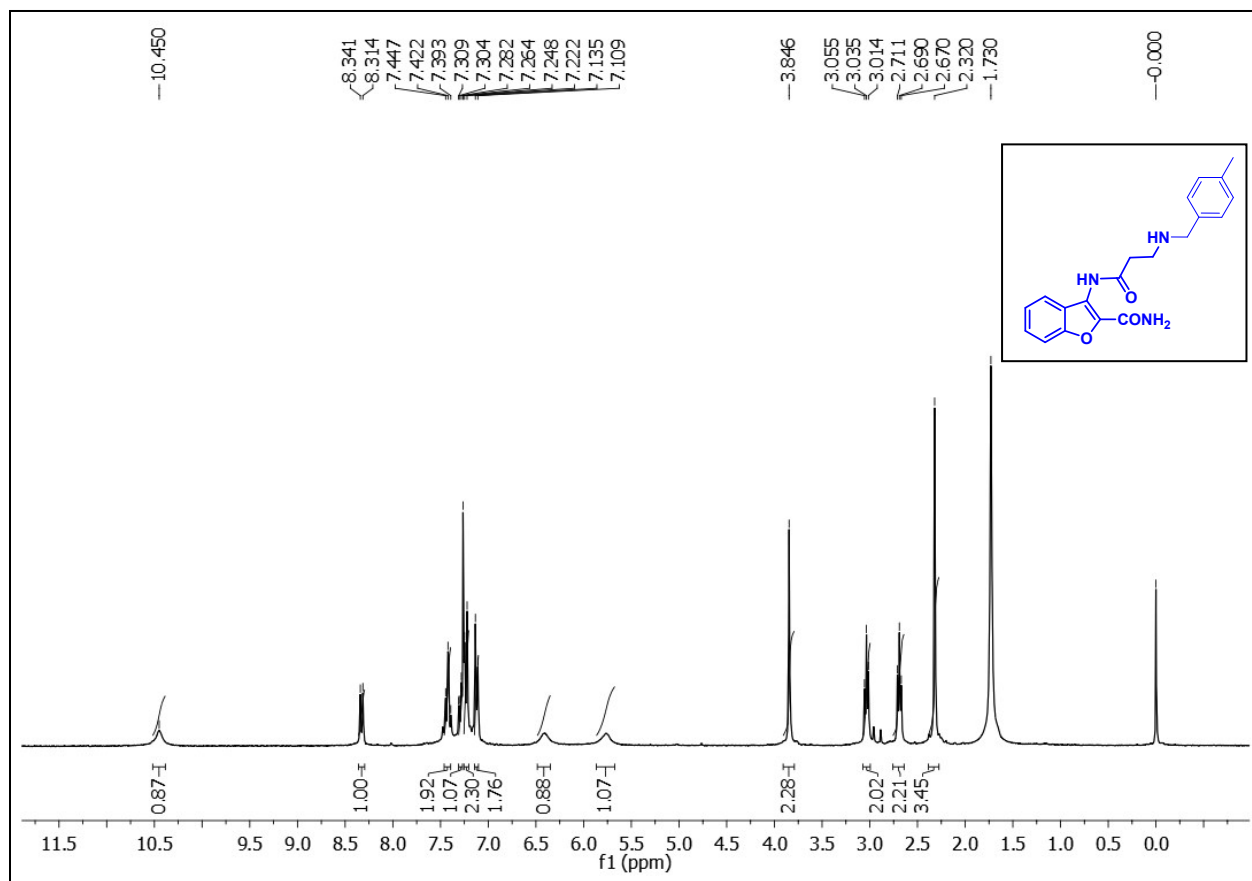

Fig. S5  $^1\text{H}$  NMR ( $\text{CDCl}_3$ , 300MHz) of BAA

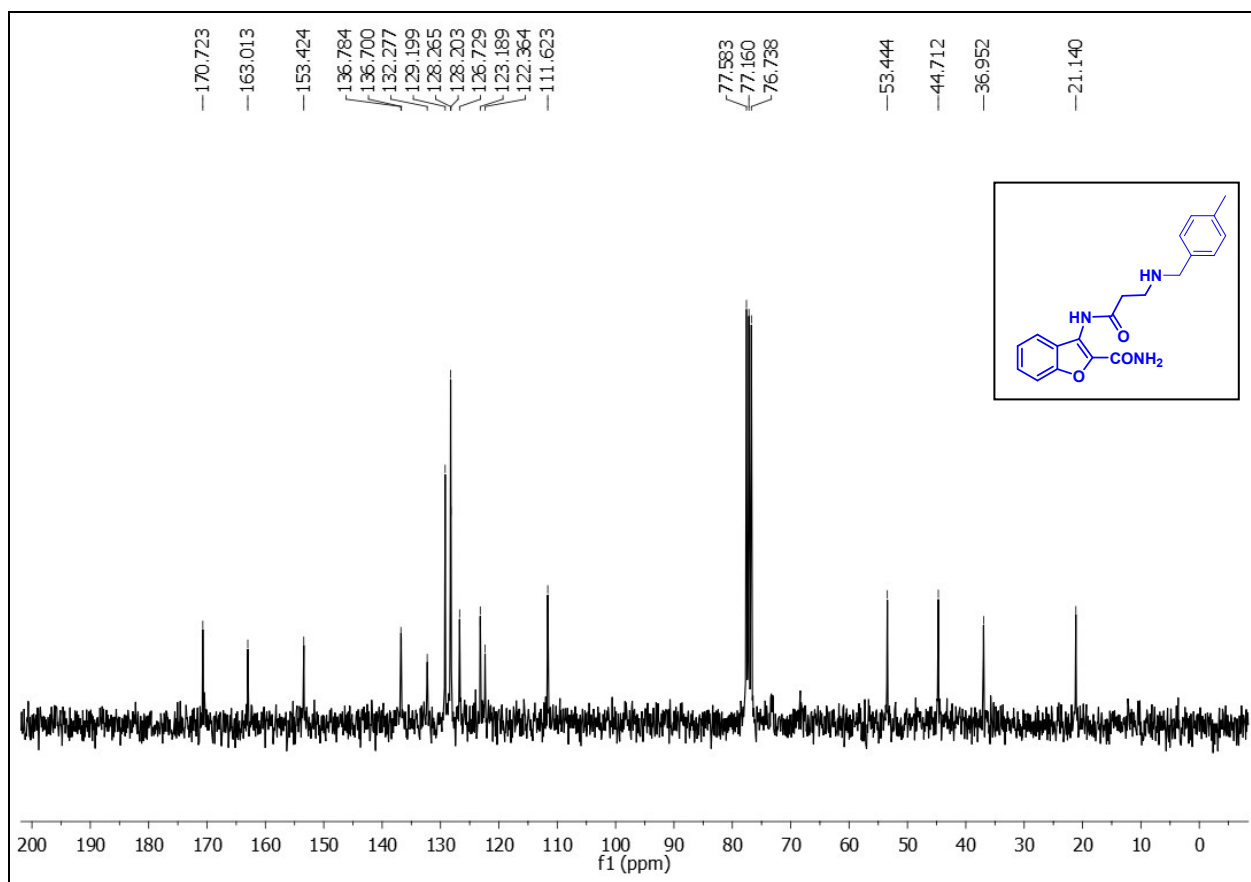

Fig. S6  $^{13}\text{C}$  NMR ( $\text{CDCl}_3$ , 75MHz) spectrum of **BAA**

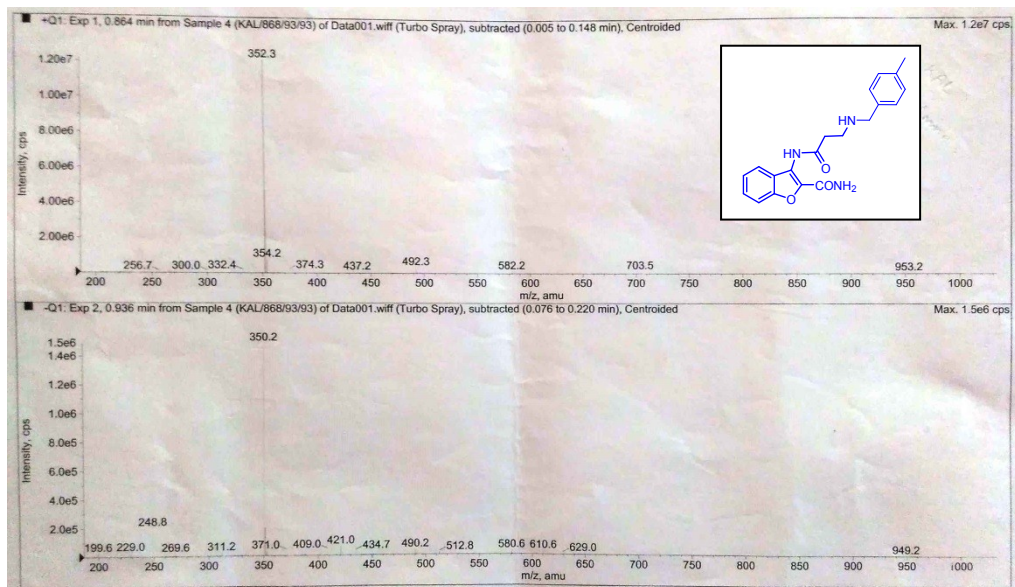

**Fig. S7** ESI-Mass spectrum of BAA

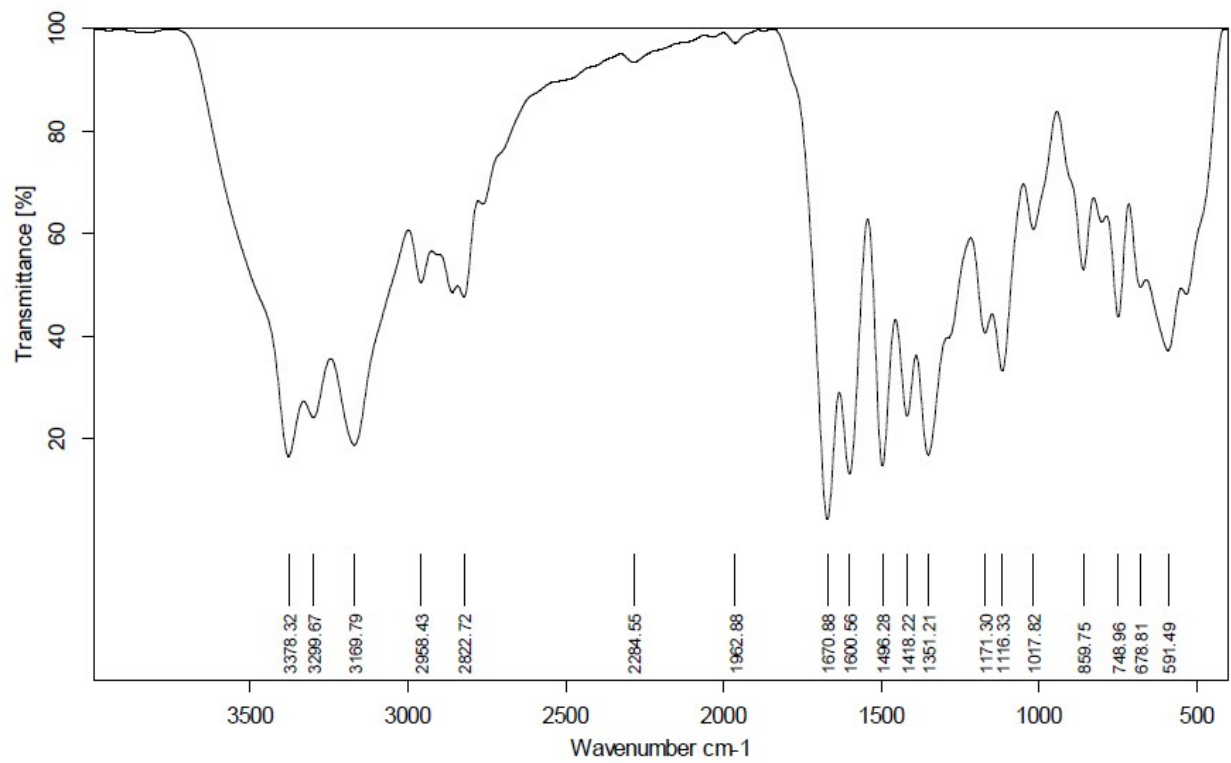

**Fig. S8** IR spectrum of BAA



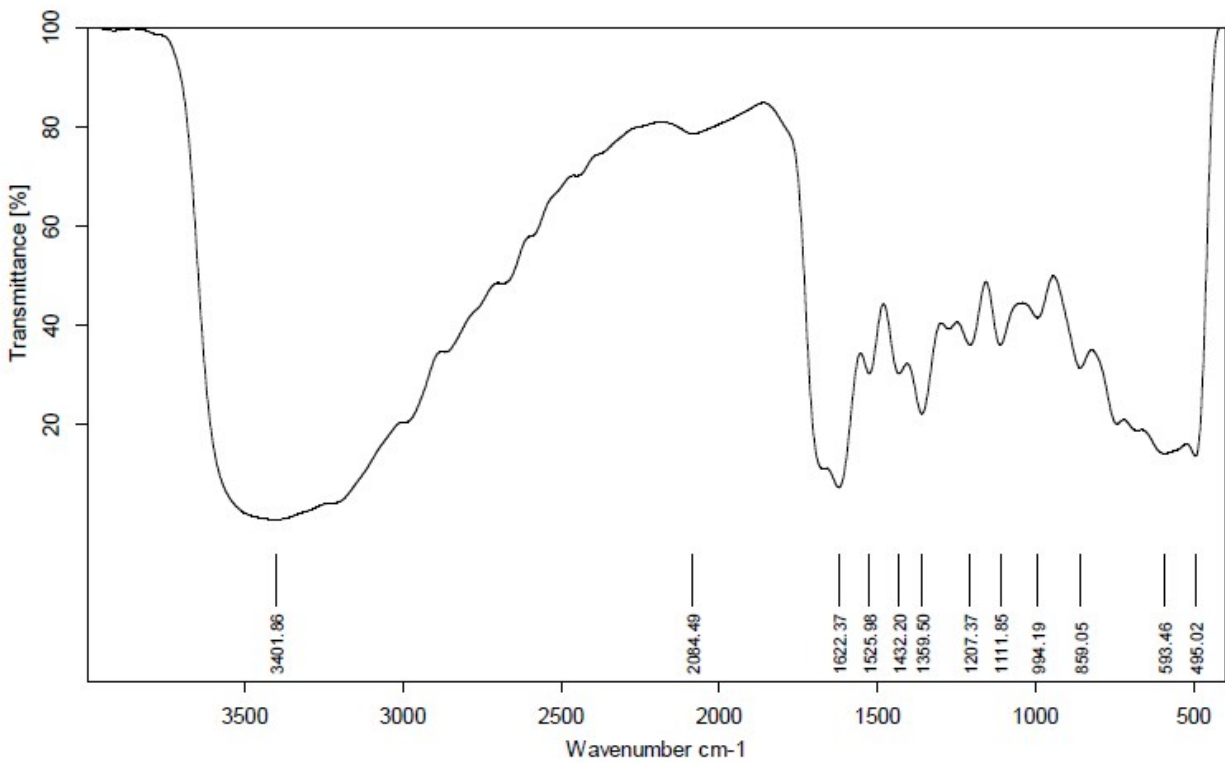

**Fig. S9** IR spectrum of **BAA-Fe<sup>3+</sup>** complex

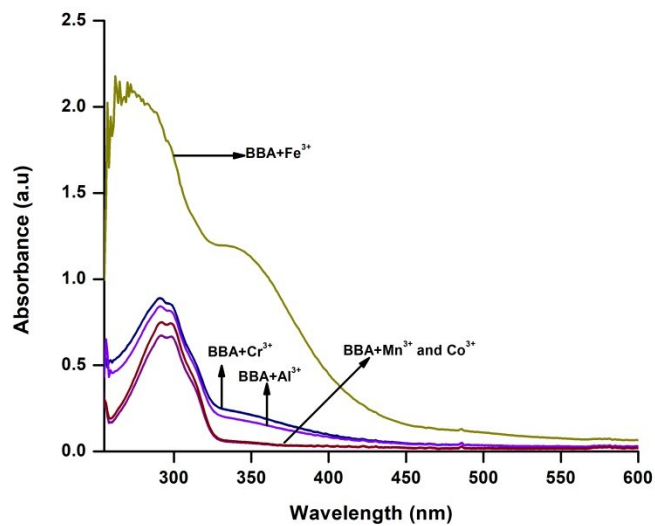

**Fig. S10** UV-vis spectra of **BAA** (25 μM) with 10 equiv. of various trivalent metal ions in DMSO/H<sub>2</sub>O solution (9:1, v/v).

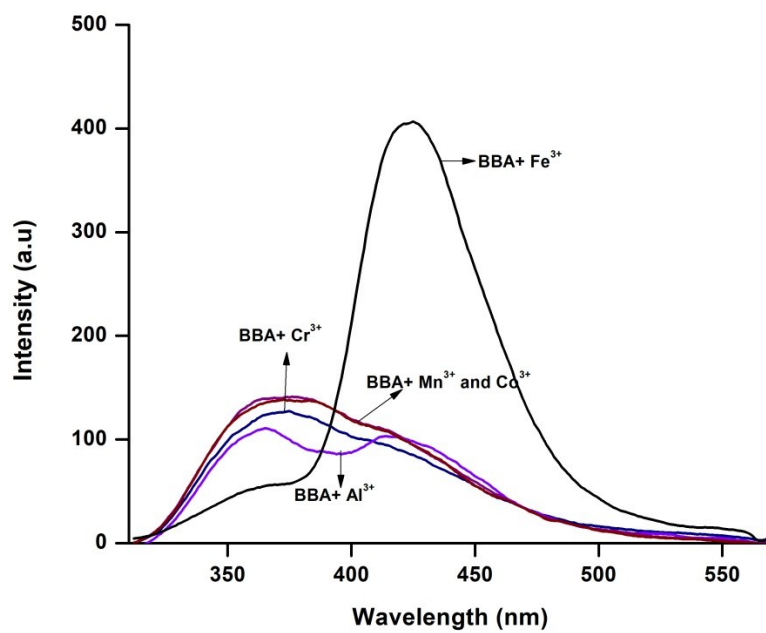

**Fig. S11** Fluorescence spectra of **BAA** (25 μM) with 10 equiv. of various trivalent metal ions in DMSO/H<sub>2</sub>O solution (9:1, v/v).

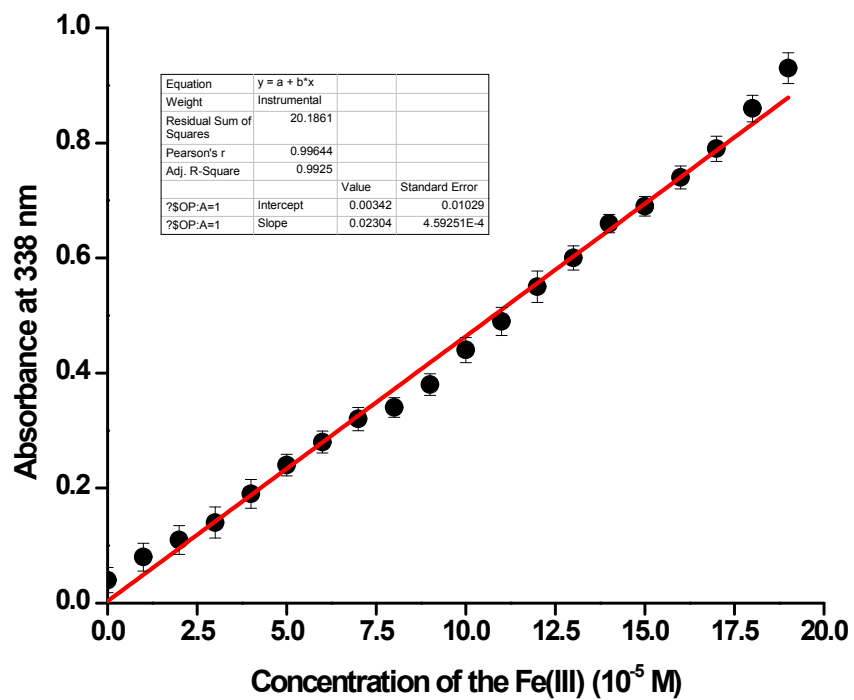

Fig. S12 Linearity plot derived from sensitivity experiment in UV-vis spectroscopy.

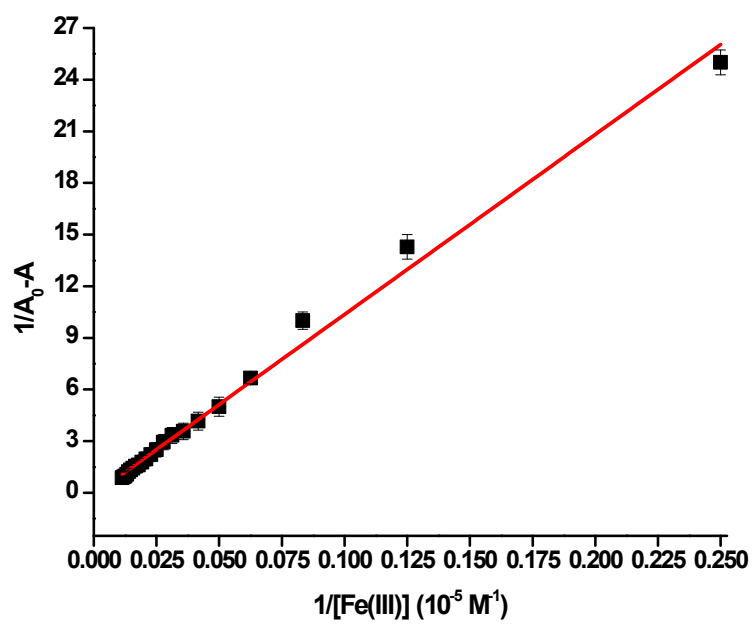

Fig. S13 B-H plot analysis of  $Fe^{3+}$  with BAA from UV-vis Spectroscopy.

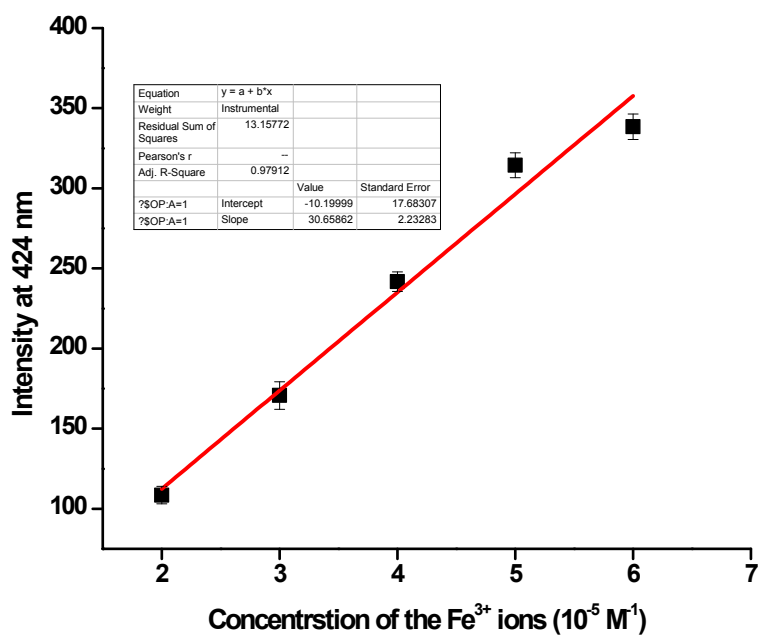

**Fig. S14** Linearity plot derived from sensitivity experiment in Fluorescence spectroscopy.

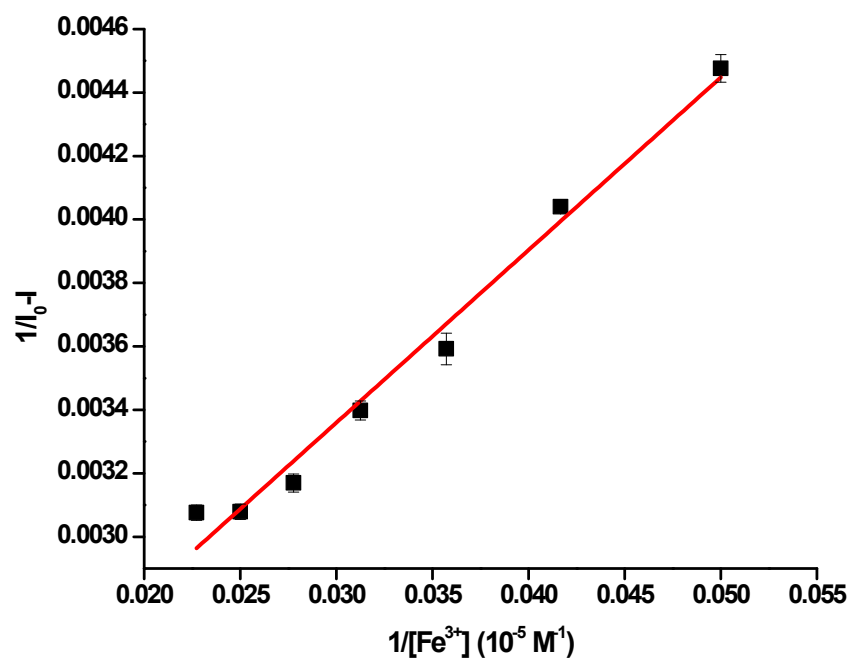

Fig. S15 B-H plot analysis of  $Fe^{3+}$  with **BAA** from Fluorescence Spectroscopy.

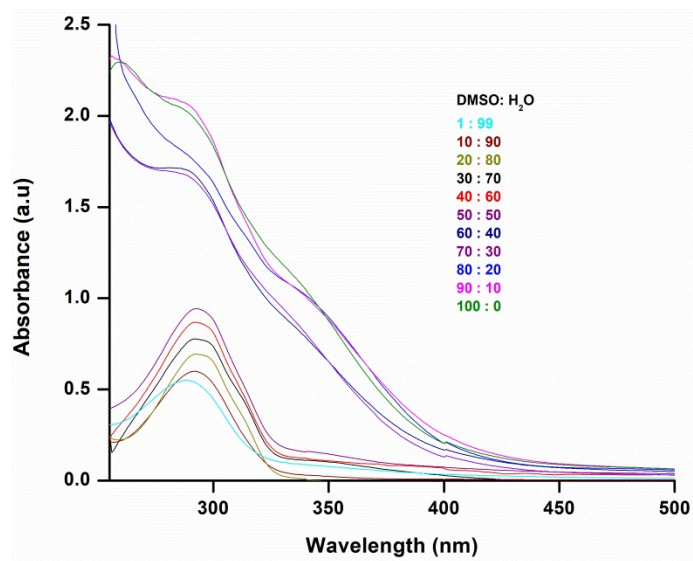

**Fig. S16** Absorbance spectroscopy of Chemosensor with Fe<sup>3+</sup> ions in various solvent fractions.



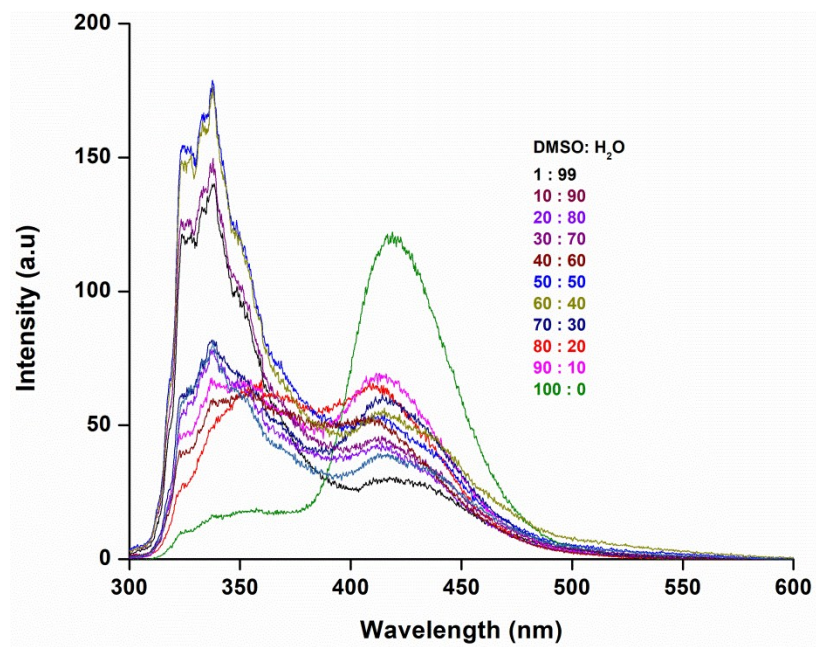

**Fig. S17** Fluorescence spectroscopy of chemosensor with Fe<sup>3+</sup> ions in various solvent fractions.
